# Supplementary material for: Associations between dietary intake and glucose tolerance in clinical and metabolomics-based metabotypes
Source: PubMed Central journal article supplement (PMC10007735; doi:10.1186/s12263-023-00721-6), 2023-03-10
Supplement: 12263_2023_721_MOESM2_ESM.pdf [file 12263_2023_721_MOESM2_ESM.pdf]

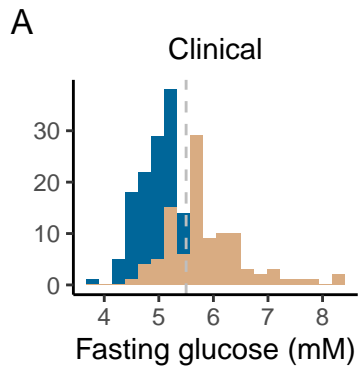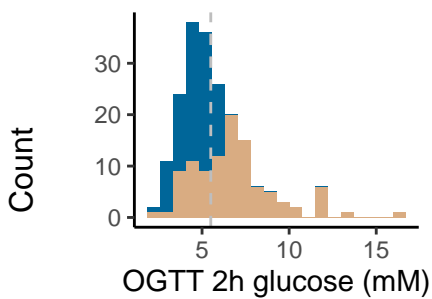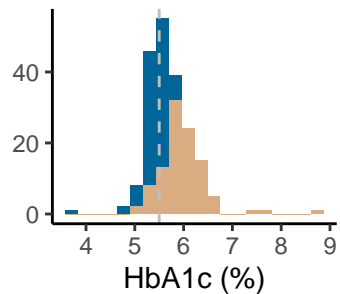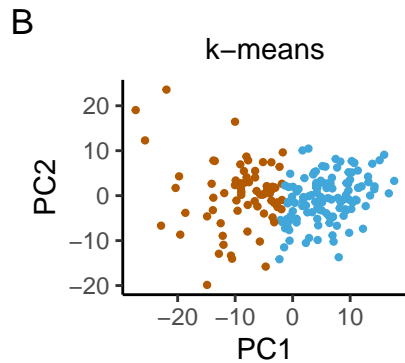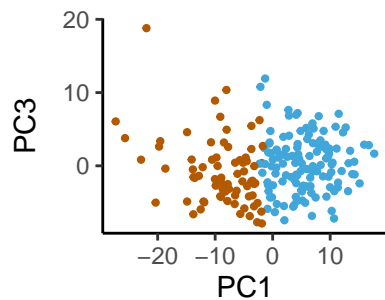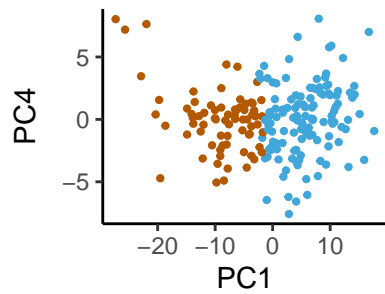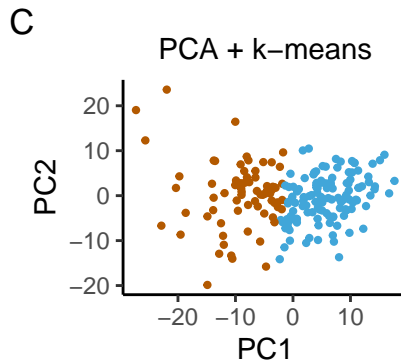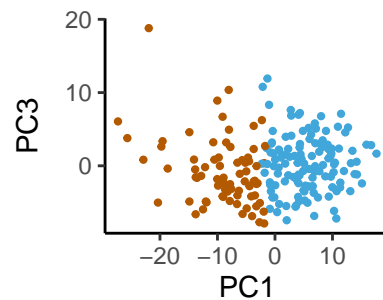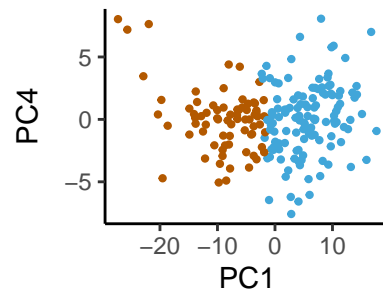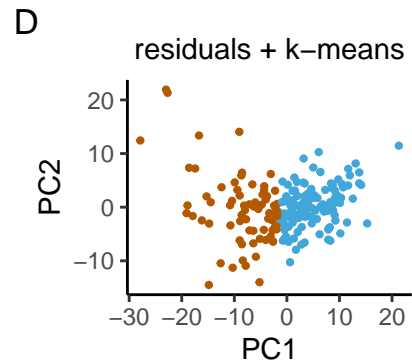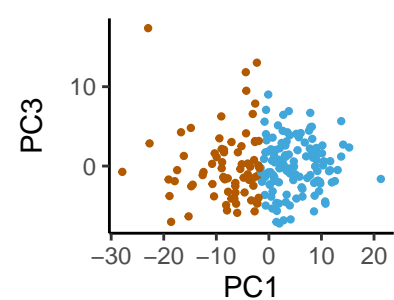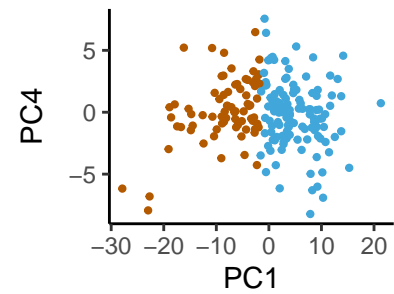

Clinical metabolite  Favorable  Unfavorable

NMR metabolite  Favorable  Unfavorable
